# Supplementary material
Source: PubMed Central journal article supplement (PMC3856576)
Supplement: NIHMS498909-supplement-01.pdf [file NIHMS498909-supplement-01.pdf]

Supplemental Online Figure SF1. Representation of linkage-disequilibrium (LD) structure in the FKBP5 region using  $r^2$

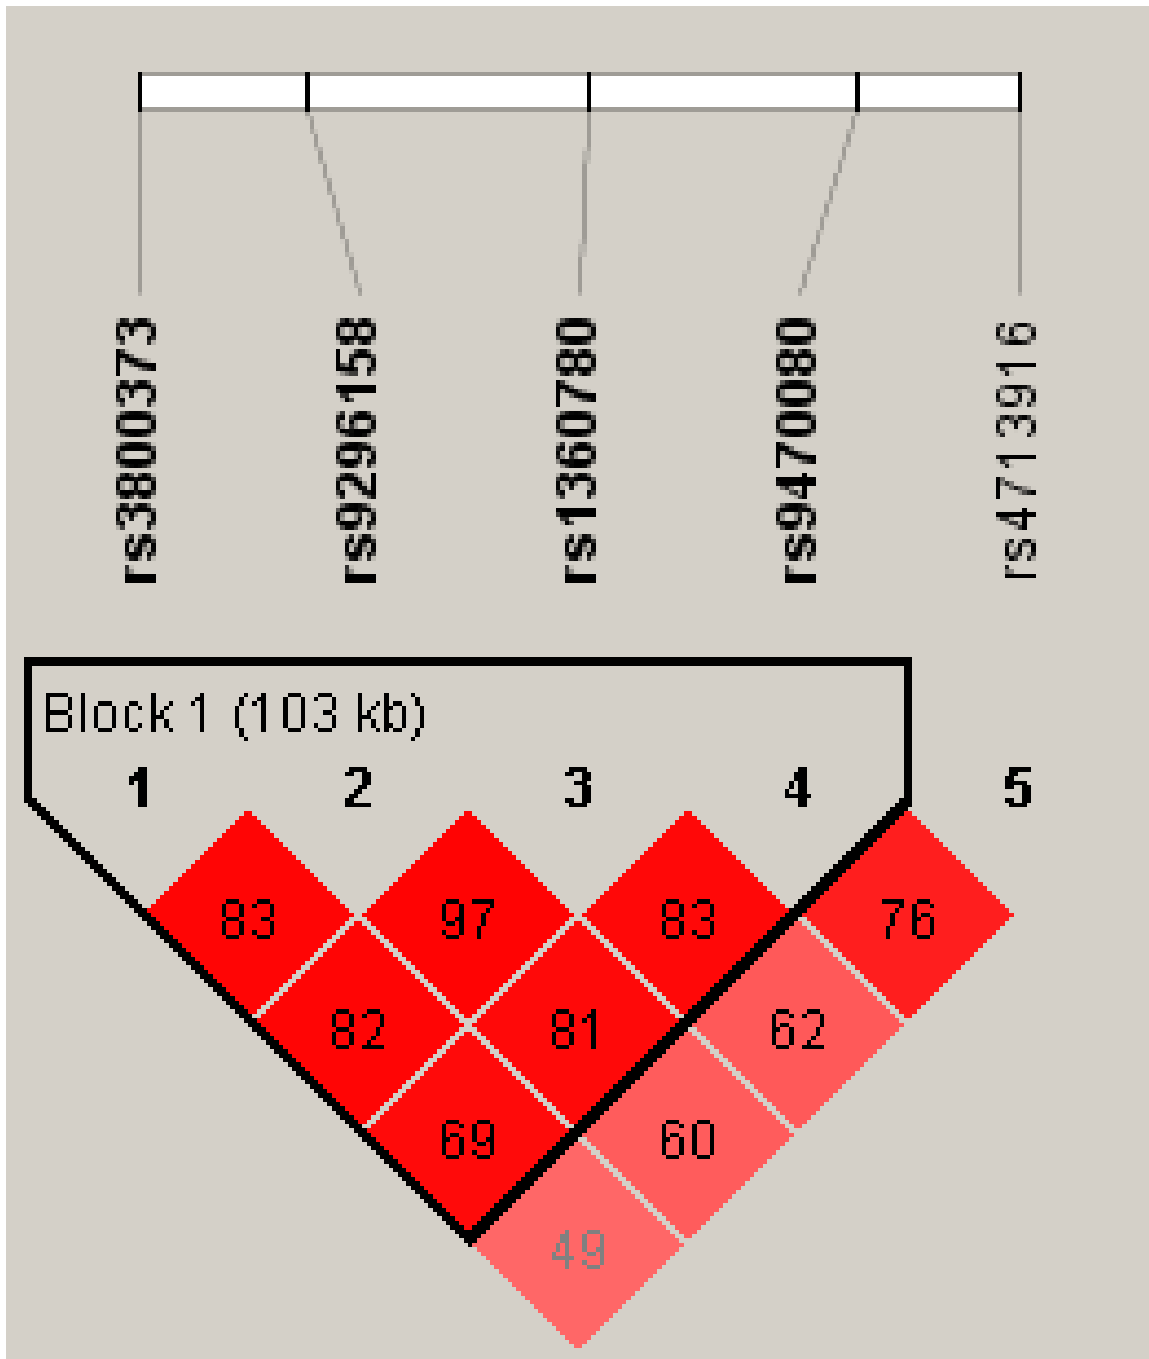

Note. The figure shows the LD plot of all tested SNPs using  $r^2$  as the measure of LD.  $r^2$  values are printed in the respective square for compared SNPs, with darker red values representing higher levels of LD.  $r^2 = 1$  would indicate complete LD.

**Supplemental Online Table ST1. List of tested *FKBP5* SNPs, their positions on human chromosome 6 (6p21.3-21.2), Hardy-Weinberg Equilibrium test p-value (HWpval), minor allele frequency (MAF) and call rate (N=884).** The HWE tests for the SNPs of EDSP respondents without MDE revealed a nominal deviation, which did not withstand Bonferroni-correction for multiple testing (5 SNPs x 2 populations). Although call rates were close to 100%, to exclude genotyping errors we compared the genotypes of rs1360780 and rs9470080 with results of high-throughput genotyping (Illumina 550k Bead Chip, Illumina Inc., San Diego, CA, USA), which is available for these SNPs in a subsample of 169 respondents. 100% concordance in genotyping was observed.

| SNP       | Position <sup>a</sup> | Function                      | MDE    |      |           | No MDE |      |           |
|-----------|-----------------------|-------------------------------|--------|------|-----------|--------|------|-----------|
|           |                       |                               | HWpval | MAF  | Call Rate | HWpval | MAF  | Call Rate |
| rs3800373 | 35650454              | 3' UTR                        | 0.185  | 0.27 | 99.37     | 0.024* | 0.25 | 99.72     |
| rs9296158 | 35675060              | Intron                        | 0.247  | 0.29 | 100.00    | 0.007* | 0.28 | 100.00    |
| rs1360780 | 35715549              | Intron                        | 0.163  | 0.28 | 100.00    | 0.013* | 0.29 | 100.00    |
| rs9470080 | 35754413              | Intron                        | 0.570  | 0.30 | 100.00    | 0.045* | 0.32 | 100.00    |
| rs4713916 | 35777961-8002         | 5' flanking (range inserting) | 0.800  | 0.27 | 100.00    | 0.031* | 0.30 | 99.86     |

a Chromosomal positions are given according to the March 2006 (hg18) human reference sequence database (NCBI Build 36.1) of the International Human Genome Sequencing Consortium;

\* p < 0.05; for all SNPs: no significant deviation from HWE after Bonferroni-correction for multiple testing (5 SNPs\* 2 populations).

**Supplemental Online Table ST2. Associations between baseline adverse events and SNPs of the *FKBP5* gene.** Presence of potential gene-environment correlations (rGE) were tested by evaluating the association between *FKBP5* polymorphisms and the exposure to adverse events. Associations at the nominal level of significance were almost exclusively found for rs4713916 with carriers of the major allele (AG/GG) being less frequently exposed to adverse events compared to non-carriers (AA). No effect withstood correction for multiple testing.

|                                         | Proportion of Respondents with Respective Adverse Event <sup>c</sup> among ... |                                  |                                                     | <i>ab vs aa</i><br>OR (95%CI) <sup>a</sup> | <i>bb vs aa</i><br>OR (95%CI) <sup>a</sup> | <i>ab vs bb</i><br>OR (95%CI) <sup>a</sup> |
|-----------------------------------------|--------------------------------------------------------------------------------|----------------------------------|-----------------------------------------------------|--------------------------------------------|--------------------------------------------|--------------------------------------------|
|                                         | Subjects Homozygous<br>for the Minor Allele<br>'aa'                            | Heterozygous<br>Subjects<br>'ab' | Subjects Homozygous<br>for the Major Allele<br>'bb' |                                            |                                            |                                            |
| Lifetime adverse event until baseline   | n (%) <sup>a</sup>                                                             | n (%) <sup>a</sup>               | n (%) <sup>a</sup>                                  |                                            |                                            |                                            |
| <b>rs3800373 (CC/CA/AA)<sup>b</sup></b> |                                                                                |                                  |                                                     |                                            |                                            |                                            |
| <i>Any adverse event</i>                | 29 (40.3)                                                                      | 102 (33.4)                       | 166 (32.9)                                          | 0.8 (0.46-1.36)                            | 0.8 (0.45-1.28)                            | 1.0 (0.76-1.41)                            |
| <i>Any separation event</i>             | 19 (26.4)                                                                      | 73 (23.9)                        | 130 (25.8)                                          | 0.9 (0.51-1.68)                            | 1.0 (0.57-1.78)                            | 0.9 (0.65-1.29)                            |
| <i>Any trauma</i>                       | 14 (19.4)                                                                      | 43 (14.1)                        | 61 (12.1)                                           | 0.7 (0.37-1.46)                            | 0.6 (0.31-1.17)                            | 1.2 (0.79-1.87)                            |
| <i>Any severe trauma</i>                | 11 (15.3)                                                                      | 32 (10.5)                        | 47 (9.3)                                            | 0.7 (0.33-1.49)                            | 0.6 (0.29-1.23)                            | 1.2 (0.72-1.90)                            |
| <b>rs9296158 (AA/AG/GG)<sup>b</sup></b> |                                                                                |                                  |                                                     |                                            |                                            |                                            |
| <i>Any adverse event</i>                | 38 (42.7)                                                                      | 102 (31.5)                       | 158 (33.6)                                          | 0.7 (0.40-1.07)                            | 0.7 (0.44-1.13)                            | 0.9 (0.68-1.26)                            |
| <i>Any separation event</i>             | 26 (29.2)                                                                      | 74 (22.8)                        | 123 (26.1)                                          | 0.8 (0.44-1.29)                            | 0.9 (0.53-1.47)                            | 0.9 (0.61-1.20)                            |
| <i>Any trauma</i>                       | 18 (20.2)                                                                      | 41 (12.7)                        | 59 (12.5)                                           | 0.6 (0.33-1.16)                            | 0.6 (0.33-1.09)                            | 1.0 (0.67-1.60)                            |
| <i>Any severe trauma</i>                | 15 (16.9)                                                                      | 29 (9.0)                         | 46 (9.8)                                            | 0.5 (0.26-1.04)                            | 0.6 (0.29-1.07)                            | 0.9 (0.57-1.53)                            |
| <b>rs1360780 (TT/CT/CC)<sup>b</sup></b> |                                                                                |                                  |                                                     |                                            |                                            |                                            |
| <i>Any adverse event</i>                | 39 (43.3)                                                                      | 105 (32.1)                       | 154 (33.0)                                          | 0.7 (0.40-1.06)                            | 0.7 (0.41-1.07)                            | 1.0 (0.72-1.33)                            |
| <i>Any separation event</i>             | 27 (30.0)                                                                      | 75 (22.9)                        | 121 (25.9)                                          | 0.7 (0.43-1.24)                            | 0.8 (0.51-1.39)                            | 0.9 (0.62-1.22)                            |
| <i>Any trauma</i>                       | 18 (20.0)                                                                      | 43 (13.2)                        | 57 (12.2)                                           | 0.7 (0.35-1.22)                            | 0.6 (0.32-1.06)                            | 1.1 (0.72-1.72)                            |
| <i>Any severe trauma</i>                | 15 (16.7)                                                                      | 30 (9.2)                         | 45 (9.6)                                            | 0.5 (0.27-1.07)                            | 0.6 (0.29-1.06)                            | 1.0 (0.59-1.60)                            |
| <b>rs9470080 (TT/CT/CC)<sup>b</sup></b> |                                                                                |                                  |                                                     |                                            |                                            |                                            |
| <i>Any adverse event</i>                | 41 (39.8)                                                                      | 112 (31.4)                       | 145 (34.2)                                          | 0.7 (0.45-1.14)                            | 0.8 (0.51-1.27)                            | 0.9 (0.65-1.21)                            |
| <i>Any separation event</i>             | 29 (28.2)                                                                      | 81 (22.7)                        | 113 (26.7)                                          | 0.8 (0.47-1.28)                            | 0.9 (0.58-1.54)                            | 0.8 (0.58-1.14)                            |
| <i>Any trauma</i>                       | 20 (19.4)                                                                      | 45 (12.6)                        | 53 (12.5)                                           | 0.6 (0.35-1.14)                            | 0.6 (0.34-1.10)                            | 1.0 (0.66-1.58)                            |
| <i>Any severe trauma</i>                | 17 (16.5)                                                                      | 32 (9.0)                         | 41 (9.7)                                            | 0.5 (0.27-0.99)*                           | 0.6 (0.30-1.04)                            | 0.9 (0.57-1.53)                            |
| <b>rs4713916 (AA/AG/GG)<sup>b</sup></b> |                                                                                |                                  |                                                     |                                            |                                            |                                            |
| <i>Any adverse event</i>                | 39 (44.8)                                                                      | 109 (31.9)                       | 150 (33.0)                                          | 0.6 (0.36-0.96)*                           | 0.6 (0.38-0.99)*                           | 1.0 (0.70-1.29)                            |
| <i>Any separation event</i>             | 29 (33.3)                                                                      | 79 (23.1)                        | 115 (25.3)                                          | 0.6 (0.36-1.02)*                           | 0.7 (0.41-1.13)                            | 0.9 (0.64-1.24)                            |
| <i>Any trauma</i>                       | 19 (21.8)                                                                      | 43 (12.6)                        | 56 (12.3)                                           | 0.5 (0.28-0.97)*                           | 0.5 (0.28-0.93)*                           | 1.0 (0.67-1.58)                            |
| <i>Any severe trauma</i>                | 16 (18.4)                                                                      | 31 (9.1)                         | 43 (9.5)                                            | 0.5 (0.23-0.88)*                           | 0.5 (0.24-0.89)*                           | 1.0 (0.59-1.57)                            |

a "n (%)" = number and percentage of respondents; "OR" = odds ratio of a multiple logistic regression; "CI" = confidence interval;

b minor alleles: rs3800373: C; rs9296158: A; rs1360780: T; rs9470080: T; rs4713916: A;

c reference group: without the respective adverse event until baseline;

\* p < 0.05 for an OR controlled for age and gender; no effect withstood correction for multiple testing.
