# Supplementary material
Source: PubMed Central journal article supplement (PMC3856576)
Supplement: NIHMS498909-supplement-Supplement.pdf [file NIHMS498909-supplement-Supplement.pdf]

1  
2  
3 **Online-Only Material**

4 **Interaction of Variants in the *FKBP5* Gene and Adverse Life Events in Predicting the**  
5 **First Depression Onset: Results from a Ten-Year Prospective**  
6 **Community Study**

7 Petra Zimmermann, PhD<sup>1</sup>

8 Tanja Brückl, PhD<sup>1</sup>

9 Agnes Nocon, MSc<sup>1</sup>

10 Angela Heck, PhD<sup>1,2</sup>

11 Hildegard Pfister, Dipl.-Inf.<sup>1</sup>

12 Elisabeth Binder, MD, PhD<sup>1</sup>

13 Manfred Uhr, MD, PhD<sup>1</sup>

14 Roselind Lieb, PhD<sup>1,3</sup>

15 Terrie E. Moffitt, PhD<sup>4,5</sup>

16 Avshalom Caspi, PhD<sup>4,5</sup>

17 Florian Holsboer, MD, PhD<sup>1</sup>

18 Marcus Ising, PhD<sup>1</sup>

19  
20  
21 <sup>1</sup> Max Planck Institute of Psychiatry, Molecular Psychology, Kraepelinstrasse 2,  
22 80804 Munich, Germany

23 <sup>2</sup> Current address: University of Basel, Department of Psychology, Molecular  
24 Psychology, Missionsstraße 60-62, 4055 Basel, Switzerland

25 <sup>3</sup> Current address: University of Basel, Department of Psychology, Epidemiology and  
26 Health Psychology, Missionsstraße 60-62, 4055 Basel, Switzerland

27 <sup>4</sup> Departments of Psychology and Neuroscience and Psychiatry and Behavioral Sciences  
28 and Institute for Genome Sciences and Policy, Duke University, Durham, North  
29 Carolina

30 <sup>5</sup> Social, Genetic, and Developmental Psychiatry Centre, Institute of Psychiatry, King's  
31 College London, London, England

32

33

34

## 35 **Methods**

### 36 **Sociodemographic characteristics of the EDSP Sample**

37 47.7% of the 996 EDSP respondents were males and 52.3% females aged between 21 and 34 years (md=26) at  
38 the time of T3. 7.8% attended secondary general school, 23.6% intermediate secondary school, and 67.2%  
39 grammar school. At T3, 0.6% were still at school, 2.7% made an apprenticeship, 34.9% attended university,  
40 46.8% were employed, and 4.2% unemployed. 19.6% were living with their parents, 27.1% alone, and 42.7%  
41 with their partner/spouse. The majority of the respondents were classified as middle (58.7%) or upper middle  
42 class (26.7%) reflecting the population of Munich. When comparing the 996 individuals participating in the  
43 molecular-genetic project with the rest of the T3-sample (n=1214), we found no difference in the prevalence of  
44 mental disorders, adverse events, or sociodemographic factors but one; respondents with a lower educational  
45 level were less likely to participate (OR=0.7; 95%CI=0.47-0.91). To exclude a selection bias of our findings, we  
46 tested for an association between educational level and 'incident MDE' in the total sample of T3 (N=2210) and  
47 found no association (OR=1.1; 95%CI=0.81-1.40).

### 48 **Definition of the covariates**

49 The category "anxiety disorder" included the following DSM-IV diagnoses: panic disorder, agoraphobia,  
50 specific phobia, phobia NOS, social phobia, generalized anxiety disorder, obsessive compulsive disorder,  
51 PTSD). "Substance use disorders (SUD" was composed of DSM-IV alcohol abuse/dependence, nicotine  
52 dependence and illicit drug abuse/dependence.

### 53 **Frequency of traumatic events**

54 The following 7 traumatic events were assessed: 1) "war" (n=2; 0.2%), 2) "physical threat/violence" (n=49;  
55 5.5%), 3) "rape" (n=7; 0.8%), 4) "sexual abuse as child" (n=12; 1.4%), 5) "natural disaster" (n=4; 0.5%), 6)  
56 "serious accident" (n=56; 6.3%), and 7) "being kidnapped" (n=1; 0.1%). "Any trauma" comprises all traumatic  
57 events (n=118; 13.4%). "

### 58 **Power calculation**

59 Power calculation for the GxE analysis was conducted using Quanto Version 1.2.3 (<http://hydra.usc.edu/gxe/>).  
60 Model estimates were derived from the present data set (population disease risk: .20; prevalence of adverse  
61 events: .30; minor allele frequency: .3; alpha level of significance: .005, 2-sided). Following a log-additive  
62 model and assuming genetic and environmental main effects with a relative risk of 1.5 and 2.0, respectively, we  
63 calculated a power of 80% to detect GxE effects with a relative risk of at least 1.55, which is between the limit of  
64 a small (1.22) and medium effect (1.86) according to the classification by Cohen<sup>1</sup>.

### 65 **Diagnostic assessment in the replication samples**

66 In the Dunedin study, MDE was evaluated with the Diagnostic Interview Schedule (DIS)<sup>2,3</sup> when study members  
67 were ages 18, 21, 26, and 32 years. At ages 18 and 21 years diagnoses followed the then-current DSM-III-R, and  
68 at ages 26 and 32 years diagnoses followed DSM-IV.

69 In the E-Risk study, MDE was evaluated with the Diagnostic Interview Schedule (DIS)<sup>3</sup> following DSM-IV  
70 criteria when study members were ages 33, 35, 38, and 40 years.

## 71 **Results**

### 72 **Associations between MDE and adverse events**

73 Compared to respondents without baseline adversity, respondents with exposure to any adverse event prior to  
74 baseline were more likely to report the first onset of MDE during follow-up (21.1% vs. 16.4%; OR=1.5;  
75 95%CI=1.01-2.09; p=0.039). Associations with separation events (21.5% vs. 16.8%; OR=1.4; 95%CI=0.97-  
76 2.09; p=0.071) and trauma (22.9% vs. 17.2%; OR=1.6; 95%CI=0.96-2.52; p=0.067) were not significant, but  
77 severe trauma was associated with MDE onset (26.7% vs. 17.0%; OR=1.9; 95%CI=1.16-3.22; p=0.011)  
78 withstanding correction for multiple testing (for two independent event categories; p<sub>corrected</sub>=0.022).

### 79 **Associations between genotype and adverse events**

80 Presence of potential gene-environment correlations (rGE) were tested by evaluating the association between  
81 *FKBP5* polymorphisms and the exposure to adverse events (**eTable 1**). Associations at the nominal level of  
82 significance were almost exclusively found for rs4713916 with carriers of the major allele (AG/GG) being less  
83 frequently exposed to adverse events compared to non-carriers (AA). No effect withstood correction for multiple  
84 testing.

94  
95  
96  
97  
98  
99  
100  
101  
102  
103  
104

**References**

1. Cohen J. *Statistical Power Analysis for the Behavioral Sciences*. 2nd ed. Hillsdale, NJ, USA: Lawrence Erlbaum Assoc Inc; 1988.
2. Robins LN, Helzer JE, Cottler L, Goldring E. *Diagnostic Interview Schedule, Version III-R*. St Louis, MO: Washington University School of Medicine; 1989.
3. Robins LN, Cottler L, Bucholz KK, Compton W. *Diagnostic Interview Schedule for DSM-IV*. St Louis, MO: Washington University School of Medicine; 1995.

05

**eTable 1. Associations between baseline adverse events and SNPs of the *FKBP5* gene**

|                                                | Proportion of Respondents with Respective Adverse Event <sup>c</sup> among ... |                            |                                             | <i>ab vs aa</i><br>OR (95%CI) <sup>a</sup> | <i>bb vs aa</i><br>OR (95%CI) <sup>a</sup> | <i>ab vs bb</i><br>OR (95%CI) <sup>a</sup> |
|------------------------------------------------|--------------------------------------------------------------------------------|----------------------------|---------------------------------------------|--------------------------------------------|--------------------------------------------|--------------------------------------------|
|                                                | Subjects Homozygous<br>for the Minor Allele                                    | Heterozygous<br>Subjects   | Subjects Homozygous<br>for the Major Allele |                                            |                                            |                                            |
|                                                | 'aa'<br>n (%) <sup>a</sup>                                                     | 'ab'<br>n (%) <sup>a</sup> | 'bb'<br>n (%) <sup>a</sup>                  |                                            |                                            |                                            |
| <b>Lifetime adverse event until baseline</b>   |                                                                                |                            |                                             |                                            |                                            |                                            |
| <b><u>rs3800373 (CC/CA/AA)</u><sup>b</sup></b> |                                                                                |                            |                                             |                                            |                                            |                                            |
| <i>Any adverse event</i>                       | 29 (40.3)                                                                      | 102 (33.4)                 | 166 (32.9)                                  | 0.8 (0.46-1.36)                            | 0.8 (0.45-1.28)                            | 1.0 (0.76-1.41)                            |
| <i>Any separation event</i>                    | 19 (26.4)                                                                      | 73 (23.9)                  | 130 (25.8)                                  | 0.9 (0.51-1.68)                            | 1.0 (0.57-1.78)                            | 0.9 (0.65-1.29)                            |
| <i>Any trauma</i>                              | 14 (19.4)                                                                      | 43 (14.1)                  | 61 (12.1)                                   | 0.7 (0.37-1.46)                            | 0.6 (0.31-1.17)                            | 1.2 (0.79-1.87)                            |
| <i>Any severe trauma</i>                       | 11 (15.3)                                                                      | 32 (10.5)                  | 47 (9.3)                                    | 0.7 (0.33-1.49)                            | 0.6 (0.29-1.23)                            | 1.2 (0.72-1.90)                            |
| <b><u>rs9296158 (AA/AG/GG)</u><sup>b</sup></b> |                                                                                |                            |                                             |                                            |                                            |                                            |
| <i>Any adverse event</i>                       | 38 (42.7)                                                                      | 102 (31.5)                 | 158 (33.6)                                  | 0.7 (0.40-1.07)                            | 0.7 (0.44-1.13)                            | 0.9 (0.68-1.26)                            |
| <i>Any separation event</i>                    | 26 (29.2)                                                                      | 74 (22.8)                  | 123 (26.1)                                  | 0.8 (0.44-1.29)                            | 0.9 (0.53-1.47)                            | 0.9 (0.61-1.20)                            |
| <i>Any trauma</i>                              | 18 (20.2)                                                                      | 41 (12.7)                  | 59 (12.5)                                   | 0.6 (0.33-1.16)                            | 0.6 (0.33-1.09)                            | 1.0 (0.67-1.60)                            |
| <i>Any severe trauma</i>                       | 15 (16.9)                                                                      | 29 (9.0)                   | 46 (9.8)                                    | 0.5 (0.26-1.04)                            | 0.6 (0.29-1.07)                            | 0.9 (0.57-1.53)                            |
| <b><u>rs1360780 (TT/CT/CC)</u><sup>b</sup></b> |                                                                                |                            |                                             |                                            |                                            |                                            |
| <i>Any adverse event</i>                       | 39 (43.3)                                                                      | 105 (32.1)                 | 154 (33.0)                                  | 0.7 (0.40-1.06)                            | 0.7 (0.41-1.07)                            | 1.0 (0.72-1.33)                            |
| <i>Any separation event</i>                    | 27 (30.0)                                                                      | 75 (22.9)                  | 121 (25.9)                                  | 0.7 (0.43-1.24)                            | 0.8 (0.51-1.39)                            | 0.9 (0.62-1.22)                            |
| <i>Any trauma</i>                              | 18 (20.0)                                                                      | 43 (13.2)                  | 57 (12.2)                                   | 0.7 (0.35-1.22)                            | 0.6 (0.32-1.06)                            | 1.1 (0.72-1.72)                            |
| <i>Any severe trauma</i>                       | 15 (16.7)                                                                      | 30 (9.2)                   | 45 (9.6)                                    | 0.5 (0.27-1.07)                            | 0.6 (0.29-1.06)                            | 1.0 (0.59-1.60)                            |
| <b><u>rs9470080 (TT/CT/CC)</u><sup>b</sup></b> |                                                                                |                            |                                             |                                            |                                            |                                            |
| <i>Any adverse event</i>                       | 41 (39.8)                                                                      | 112 (31.4)                 | 145 (34.2)                                  | 0.7 (0.45-1.14)                            | 0.8 (0.51-1.27)                            | 0.9 (0.65-1.21)                            |
| <i>Any separation event</i>                    | 29 (28.2)                                                                      | 81 (22.7)                  | 113 (26.7)                                  | 0.8 (0.47-1.28)                            | 0.9 (0.58-1.54)                            | 0.8 (0.58-1.14)                            |
| <i>Any trauma</i>                              | 20 (19.4)                                                                      | 45 (12.6)                  | 53 (12.5)                                   | 0.6 (0.35-1.14)                            | 0.6 (0.34-1.10)                            | 1.0 (0.66-1.58)                            |
| <i>Any severe trauma</i>                       | 17 (16.5)                                                                      | 32 (9.0)                   | 41 (9.7)                                    | 0.5 (0.27-0.99) <sup>*</sup>               | 0.6 (0.30-1.04)                            | 0.9 (0.57-1.53)                            |
| <b><u>rs4713916 (AA/AG/GG)</u><sup>b</sup></b> |                                                                                |                            |                                             |                                            |                                            |                                            |
| <i>Any adverse event</i>                       | 39 (44.8)                                                                      | 109 (31.9)                 | 150 (33.0)                                  | 0.6 (0.36-0.96) <sup>*</sup>               | 0.6 (0.38-0.99) <sup>*</sup>               | 1.0 (0.70-1.29)                            |
| <i>Any separation event</i>                    | 29 (33.3)                                                                      | 79 (23.1)                  | 115 (25.3)                                  | 0.6 (0.36-1.02) <sup>*</sup>               | 0.7 (0.41-1.13)                            | 0.9 (0.64-1.24)                            |
| <i>Any trauma</i>                              | 19 (21.8)                                                                      | 43 (12.6)                  | 56 (12.3)                                   | 0.5 (0.28-0.97) <sup>*</sup>               | 0.5 (0.28-0.93) <sup>*</sup>               | 1.0 (0.67-1.58)                            |
| <i>Any severe trauma</i>                       | 16 (18.4)                                                                      | 31 (9.1)                   | 43 (9.5)                                    | 0.5 (0.23-0.88) <sup>*</sup>               | 0.5 (0.24-0.89) <sup>*</sup>               | 1.0 (0.59-1.57)                            |

06

07

08

09

10

a "n (%)" = number and percentage of respondents; "OR" = odds ratio of a multiple logistic regression; "CI" = confidence interval;

b minor alleles: rs3800373: C; rs9296158: A; rs1360780: T; rs9470080: T; rs4713916: A;

c reference group: without the respective adverse event until baseline;

\* p &lt; 0.05 for an OR controlled for age and gender;
